# Supplementary material for: Reliability and Structure of Diabetes Diet Adherence Scale (D-DAS): A Follow-up Study among Type 2 Diabetes Patients of India
Source: bioRxiv or medRxiv preprint supplement (doi:10.1101/2024.05.25.24307586), 2026-03-02

## **Online Supplementary Material**

### **Reliability and Structure of Diabetes Diet Adherence Scale (D-DAS): A Follow-up Study among Type 2 Diabetes Patients of India**

**Supplementary Table 1: The Diabetes Diet Adherence Scale (D-DAS) (English).**

| Sl. No. | Questions                                                                                                                         | Response |
|---------|-----------------------------------------------------------------------------------------------------------------------------------|----------|
| 1.      | Do you sometime forget to follow the recommended dietary approach for diabetes?                                                   | Yes/No   |
| 2.      | Over the past two weeks, were there any days when you did not take your dietary plan properly?                                    | Yes/No   |
| 3.      | Did you missed the proper dietary plan yesterday?                                                                                 | Yes/No   |
| 4.      | Have you ever cut back or stopped the recommended dietary plan without telling your doctor because you felt unnecessary to do so? | Yes/No   |
| 5.      | When you feel like your diabetes is under control, do you sometimes stop taking your dietary plan?                                | Yes/No   |
| 6.      | When you travel or leave home, do you sometimes forced to stop following your dietary plan?                                       | Yes/No   |
| 7.      | Do you ever feel hassled about sticking to your dietary plan?                                                                     | Yes/No   |
| 8.      | Did you have feelings of dietary deprivation?                                                                                     | Yes/No   |
| 9.      | Do you forget to include fruits and vegetables in your dietary plan?                                                              | Yes/No   |
| 10.     | Do you forget to cut down butter and fat intake in your food?                                                                     | Yes/No   |

**Scores: Yes=0; No=1 (Total = 10)**

*Email 1<sup>st</sup> author or Corresponding author for regional translated (Hindi) scale.*

**Supplementary Table 2: Socio-demographic information of diabetic patients.**

| <b>Variables</b> | <b>Category</b>                       | <b>n</b>    |
|------------------|---------------------------------------|-------------|
| Gender           | Male                                  | 77 (64.17)  |
|                  | Female                                | 43 (35.83)  |
| Smoking          | No                                    | 117 (97.50) |
|                  | Yes                                   | 3 (2.50)    |
| Alcohol          | No                                    | 92 (76.76)  |
|                  | Yes                                   | 28 (23.23)  |
| Food Habit       | Veg                                   | 72 (60.00)  |
|                  | Non-Veg                               | 47 (39.17)  |
|                  | Ovo                                   | 1 (0.83)    |
| Marital Status   | Married                               | 1 (0.83)    |
|                  | Unmarried                             | 119 (99.17) |
| Work Status      | Government Employee                   | 16 (13.33)  |
|                  | Non-Government Employee               | 6 (5.00)    |
|                  | Self Employed                         | 27 (22.50)  |
|                  | Non-Paid                              | 2 (1.67)    |
|                  | Student                               | 30 (25.00)  |
|                  | Homemaker                             | 36 (30.00)  |
|                  | Retired                               | 0 (0.00)    |
|                  | Unemployed (able to work)             | 3 (2.50)    |
|                  | Unemployed (unable to work)           | 0 (0.00)    |
| Education        | No Formal schooling                   | 24 (20.00)  |
|                  | Less than primary school              | 9 (7.50)    |
|                  | Primary school completed (I to V)     | 5 (4.17)    |
|                  | Middle school completed (VI to VIII)  | 5 (4.17)    |
|                  | High school completed (IX & X)        | 32 (26.67)  |
|                  | Secondary School completed (XI & XII) | 13 (10.83)  |
|                  | Graduate                              | 27 (22.50)  |
|                  | Postgraduate                          | 5 (4.17)    |

**Supplementary Table 3: Mardia's test for multivariate normality showing non-significant p-values.**

| <b>Measures</b> | <b>Beta-hat</b> | <b>kappa</b> | <b>p-value</b> |
|-----------------|-----------------|--------------|----------------|
| Skewness        | 0.589           | 10.214       | 0.037          |
| Kurtosis        | 6.530           | -1.874       | 0.061          |

**Supplementary Table 4: Showing the median and IQR values of various continuous variables at baseline.**

| <b>Variables</b> | <b>n</b> | <b>Median</b> | <b>IQR</b>      |
|------------------|----------|---------------|-----------------|
| Age (years)      | 104      | 59.50         | 52.00 – 62.25   |
| FBS (mg/dL)      | 104      | 130.00        | 112.00 – 176.50 |
| HbA1c (%)        | 66       | 8.40          | 8.30 – 9.00     |
| Weight (Kg)      | 104      | 65.00         | 60.00 – 73.25   |
| Height (cm)      | 104      | 162.80        | 156.00 – 170.70 |
| BMI              | 104      | 25.16         | 22.23 – 28.18   |

**Supplementary Table 5: Showing the percent of adherence and non-adherence to prescribed diet with demographic variables and BMI.**

| <b>Variables</b> | <b>Non-adherent</b> | <b>Adherent</b> | <b>p-value</b> |
|------------------|---------------------|-----------------|----------------|
| <b>Sex</b>       |                     |                 |                |
| Male             | 33 (47.14)          | 37 (52.86)      | 0.772          |
| Female           | 15 (44.12))         | 19 (55.88)      |                |
| <b>Alcoholic</b> |                     |                 |                |
| No               | 33 (41.25)          | 47 (58.75)      | 0.067          |
| Yes              | 15 (62.50)          | 9 (37.50)       |                |
| <b>Smoking</b>   |                     |                 |                |
| No               | 46 (45.54)          | 55 (54.46)      | 0.470          |
| Yes              | 2 (66.67)           | 1 (33.33)       |                |
| <b>BMI</b>       |                     |                 |                |
| Normal           | 18 (45.00)          | 22 (55.00)      | 0.328          |
| Underweight      | 0 (0.00)            | 2 (100.00)      |                |
| Overweight       | 3 (33.33)           | 6 (66.67)       |                |
| Obese I          | 20 (46.51)          | 23 (53.49)      |                |
| Obese II         | 7 (70.00)           | 3 (30.00)       |                |

**Supplementary Table 6: The paired difference between the median FBG at the baseline and endline.**

|          | <b>n</b> | <b>Mean±SD</b> | <b>Median IQR</b>       | <b>p-value (Wilcoxon matched pairs test)</b> |
|----------|----------|----------------|-------------------------|----------------------------------------------|
| Baseline | 104      | 140.91±3.49    | 130.5 (112.00 – 176.50) | 0.540                                        |
| Endline  | 104      | 141.46±2.26    | 139.6 (126.00 – 163.20) |                                              |

**Supplementary Table 7: Squared eta values for the first four dimensions.**

| No. | Questions                                                                                                                         | Dim.1        | Dim.2        | Dim.3        | Dim.4        |
|-----|-----------------------------------------------------------------------------------------------------------------------------------|--------------|--------------|--------------|--------------|
| D1  | Do you sometime forget to follow the recommended dietary approach for diabetes?                                                   | <i>0.260</i> | <i>0.270</i> | 0.043        | 0.035        |
| D2  | Over the past two weeks, were there any days when you did not take your dietary plan properly?                                    | <i>0.661</i> | 0.007        | <0.000       | <0.000       |
| D3  | Did you missed the proper dietary plan yesterday?                                                                                 | <i>0.443</i> | 0.004        | 0.001        | <i>0.326</i> |
| D4  | Have you ever cut back or stopped the recommended dietary plan without telling your doctor because you felt unnecessary to do so? | <i>0.511</i> | <0.000       | 0.045        | 0.021        |
| D5  | When you feel like your diabetes is under control, do you sometimes stop taking your dietary plan?                                | <i>0.373</i> | 0.025        | 0.016        | 0.129        |
| D6  | When you travel or leave home, do you sometimes forced to stop following your dietary plan?                                       | <i>0.257</i> | <i>0.267</i> | 0.102        | 0.010        |
| D7  | Do you ever feel hassled about sticking to your dietary plan?                                                                     | <i>0.477</i> | 0.001        | 0.039        | 0.033        |
| D8  | Did you have feelings of dietary deprivation?                                                                                     | 0.118        | <i>0.303</i> | 0.005        | <i>0.363</i> |
| D9  | Do you forget to include fruits and vegetables in your dietary plan?                                                              | <0.000       | 0.022        | <i>0.800</i> | 0.038        |
| D10 | Do you forget to cut down butter and fat intake in your food?                                                                     | 0.176        | <i>0.326</i> | 0.126        | 0.195        |

**Supplementary Figure 1. Plot showing the correlation between the variables and the dimensions.**

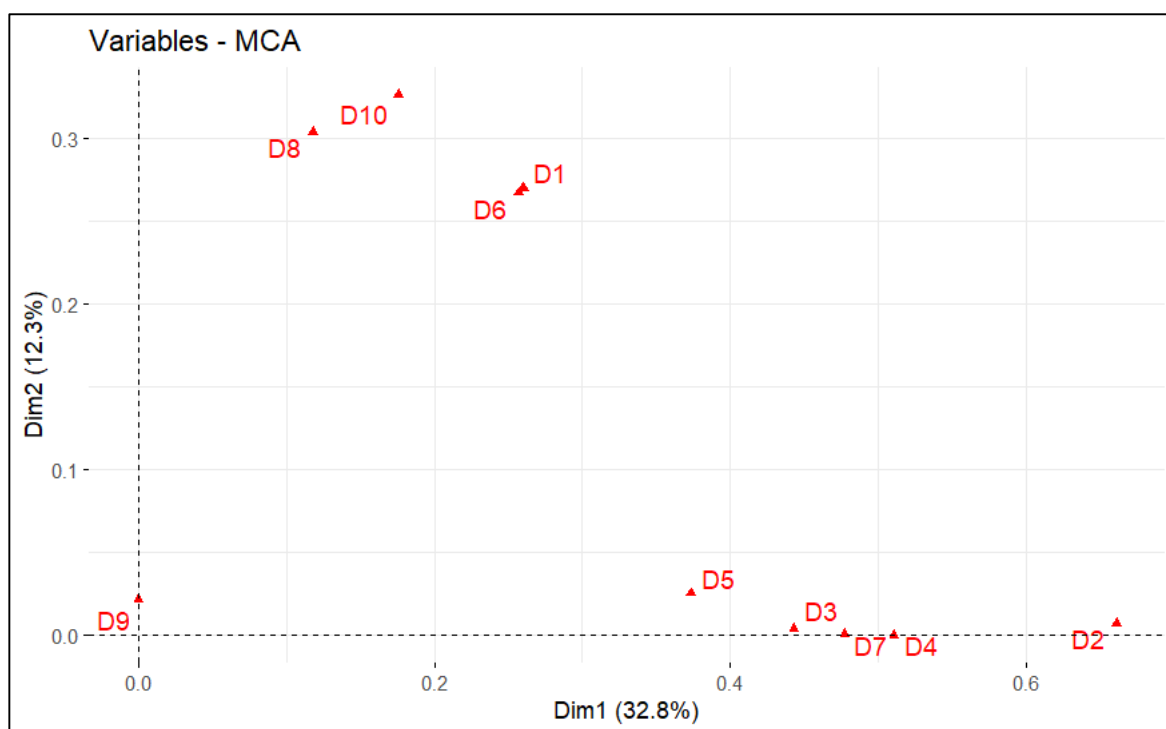

Supplement: Supplementary file [file media-1.pdf]
